# Supplementary material for: Eliminating oncogenic RAS: back to the future at the drawing board
Source: Biochem Soc Trans. 2023 Jan 23;51(1):447–56. doi: 10.1042/BST20221343 (PMC9987992; doi:10.1042/BST20221343)
Supplement: Supplementary Material 1 [file BST-51-447-s1.pdf]

## Sheet: SmallMoleculeBinders
Name	RAS specificity	RAS Binding, KD	Site on RAS	Properties	Ref.
BI-2852	GTP-/GDP-RAS	750 nM	P1	MW= 516.6 induces a nonfunctional dimer of KRAS blocks all GEF, GAP, and effector interactions	1
Cmpd2	GTP-/GDP-RAS	< 1 μM	P1	MW= 447.5 alters KRAS orientation on the membrane interferes with assembly of active RAF dimer	2
Fragment 18	GTP-/GDP-RAS	3.3 mM	P1	MW= 160.2	3
DCAI	GTP-/GDP-RAS	1.5 mM	P1	MW= 243.1 blocks both nucleotide exchange and release reactions	4
Abd-7	GTP-RAS	51 nM	P1	MW= 391.5 blocks effector interaction inhibits RAS signalling	5
Compound 3344	GTP-RAS	126 nM	P1	MW= 390.5 blocks effector interaction inhibits RAS signalling	6
Compound 11	GTP-KRAS	400−700 nM	P1	MW= 413.5 inhibits RAS signalling inhibition of cell proliferation	7
Kobe0065	GTP-RAS	46 μM	P1	MW= 449.8 blocks effector interaction anti-metastatic activity	8
KBFM123	GTP-RAS	10-100 μM	P1	MW= 271.3 Inhibition of HRAS/Raf binding	9
Ch-3	GTP-RAS	-	P1	MW= 380.5 blocks effector interaction	10
Compound 13	GDP-RAS	390 μM	P1	MW= 374.2 targets Sos-catalyzed KRAS activation	11
MRTX1133	GDP-KRAS-G12D	~0.2 pM	P2	MW= 600.6 inhibits RAS signalling anti-tumor activity	12
2C07	GTP-/GDP-RAS	~2.3 mM	P2	MW= 462.6 inhibits PI3K activation, but not Raf-1-RBD binding	13
Compound 3144	GTP-/GDP-RAS	17.8 μM	Near P1	MW= 717.6 inhibits RAS signalling anti-tumor activity	14
KAL-21404358	GTP-KRAS-G12D	100 μM	P3	MW= 357.5 blocks effector interaction inhibits RAS signalling	15
Compound B	GTP-RAS	~37 μM	-	MW= 274.4	16
MCI-062	GTP-RAS	-	-	blocks GTP loading of RAS blocks effector interaction anti-tumor activity	17
		ON-state binding
		ON- and OFF-state binding
		OFF-state binding
1.	Kessler D, Gmachl M, Mantoulidis A, Martin LJ, Zoephel A, Mayer M, et al. Drugging an undruggable pocket on KRAS. Proc Natl Acad Sci U S A. 2019;116(32):15823-9.
2.	Fang Z, Marshall CB, Nishikawa T, Gossert AD, Jansen JM, Jahnke W, et al. Inhibition of K-RAS4B by a Unique Mechanism of Action: Stabilizing Membrane-Dependent Occlusion of the Effector-Binding Site. Cell Chem Biol. 2018;25(11):1327-36 e4.
3.	Donohue E, Khorsand S, Mercado G, Varney KM, Wilder PT, Yu W, et al. Second harmonic generation detection of Ras conformational changes and discovery of a small molecule binder. Proc Natl Acad Sci U S A. 2019;116(35):17290-7.
4.	Maurer T, Garrenton LS, Oh A, Pitts K, Anderson DJ, Skelton NJ, et al. Small-molecule ligands bind to a distinct pocket in Ras and inhibit SOS-mediated nucleotide exchange activity. Proc Natl Acad Sci U S A. 2012;109(14):5299-304.
5.	Quevedo CE, Cruz-Migoni A, Bery N, Miller A, Tanaka T, Petch D, et al. Small molecule inhibitors of RAS-effector protein interactions derived using an intracellular antibody fragment. Nat Commun. 2018;9(1):3169.
6.	Bery N, Cruz-Migoni A, Bataille CJ, Quevedo CE, Tulmin H, Miller A, et al. BRET-based RAS biosensors that show a novel small molecule is an inhibitor of RAS-effector protein-protein interactions. Elife. 2018;7.
7.	McCarthy MJ, Pagba CV, Prakash P, Naji AK, van der Hoeven D, Liang H, et al. Discovery of High-Affinity Noncovalent Allosteric KRAS Inhibitors That Disrupt Effector Binding. ACS Omega. 2019;4(2):2921-30.
8.	Shima F, Yoshikawa Y, Ye M, Araki M, Matsumoto S, Liao J, et al. In silico discovery of small-molecule Ras inhibitors that display antitumor activity by blocking the Ras-effector interaction. Proc Natl Acad Sci U S A. 2013;110(20):8182-7.
9.	Matsumoto S, Hiraga T, Hayashi Y, Yoshikawa Y, Tsuda C, Araki M, et al. Molecular Basis for Allosteric Inhibition of GTP-Bound H-Ras Protein by a Small-Molecule Compound Carrying a Naphthalene Ring. Biochemistry. 2018;57(36):5350-8.
10.	Cruz-Migoni A, Canning P, Quevedo CE, Bataille CJR, Bery N, Miller A, et al. Structure-based development of new RAS-effector inhibitors from a combination of active and inactive RAS-binding compounds. Proc Natl Acad Sci U S A. 2019;116(7):2545-50.
11.	Sun Q, Burke JP, Phan J, Burns MC, Olejniczak ET, Waterson AG, et al. Discovery of small molecules that bind to K-Ras and inhibit Sos-mediated activation. Angew Chem Int Ed Engl. 2012;51(25):6140-3.
12.	Hallin J, Bowcut V, Calinisan A, Briere DM, Hargis L, Engstrom LD, et al. Anti-tumor efficacy of a potent and selective non-covalent KRASG12D inhibitor. Nat Med. 2022;28(10):2171-82.
13.	Gentile DR, Rathinaswamy MK, Jenkins ML, Moss SM, Siempelkamp BD, Renslo AR, et al. Ras Binder Induces a Modified Switch-II Pocket in GTP and GDP States. Cell Chem Biol. 2017;24(12):1455-66 e14.
14.	Welsch ME, Kaplan A, Chambers JM, Stokes ME, Bos PH, Zask A, et al. Multivalent Small-Molecule Pan-RAS Inhibitors. Cell. 2017;168(5):878-89 e29.
15.	Feng H, Zhang Y, Bos PH, Chambers JM, Dupont MM, Stockwell BR. K-Ras(G12D) Has a Potential Allosteric Small Molecule Binding Site. Biochemistry. 2019;58(21):2542-54.
16.	Tanaka T, Thomas J, Van Montfort R, Miller A, Rabbitts T. Pan RAS-binding compounds selected from a chemical library by inhibiting interaction between RAS and a reduced affinity intracellular antibody. Sci Rep. 2021;11(1):1712.
17.	Keeton AB, Ward A, Chen X, Valiyaveettil J, Zhu B, Ramirez-Alcantara V, et al. Abstract 2707: A novel RAS inhibitor, MCI-062, inhibits colon tumor growth in vivo and activates antitumor immunity. Cancer Research. 2019;79(13_Supplement):2707.

## Sheet: PROTACs
Name	RAS specificity	Half-degrading concentration (DC50)	Site on RAS	Properties	Ref.
XY-4-88	GFP- tagged KRAS-G12C	2–3 μM	P2	MW= 917.44 unable to degrade endogenous KRAS-G12C	18
LC-2	GDP-KRAS-G12C	2.5 μM	P2	MW= 1132.78 inhibits RAS signalling	19
KP-14	GDP-KRAS-G12C	1.25 μM	P2	MW= 852.16 inhibits RAS signalling	20
YF135	GDP-KRAS-G12C	3.61 μM	P2	MW= 1179.86 reversible-covalent warhead inhibits RAS signalling	21
		OFF-state binding
18.	Zeng M, Xiong Y, Safaee N, Nowak RP, Donovan KA, Yuan CJ, et al. Exploring Targeted Degradation Strategy for Oncogenic KRAS(G12C). Cell Chem Biol. 2020;27(1):19-31 e6.
19.	Bond MJ, Chu L, Nalawansha DA, Li K, Crews CM. Targeted Degradation of Oncogenic KRAS(G12C) by VHL-Recruiting PROTACs. ACS Cent Sci. 2020;6(8):1367-75.
20.	Li L, Wu Y, Yang Z, Xu C, Zhao H, Liu J, et al. Discovery of KRas G12C-IN-3 and Pomalidomide-based PROTACs as degraders of endogenous KRAS G12C with potent anticancer activity. Bioorg Chem. 2021;117:105447.
21.	Yang F, Wen Y, Wang C, Zhou Y, Zhou Y, Zhang ZM, et al. Efficient targeted oncogenic KRAS(G12C) degradation via first reversible-covalent PROTAC. Eur J Med Chem. 2022;230:114088.
